# Supplementary material for: Chestnut-like macro-acanthosphere triggered hemostasis: a featured mechanism based on puncturing red blood cells
Source: Royal Society of Chemistry journal article supplement (doi:10.1039/d1nr01148k), 2021-01-01
Supplement: d1nr01148k1.pdf [file d1nr01148k1.pdf]

## Electronic Supplementary Information (ESI)

### Chestnut-like macro-acanthosphere triggered hemostasis: a featured mechanism based on puncturing red blood cells

**Authors:** Yang Liu, <sup>a,1</sup> Kun Yu, <sup>a, b,1</sup> Songmin Shang, <sup>c</sup> Ruiqi Xie, <sup>a, b</sup> Fei Lu, <sup>a, b</sup> Rong Bao, <sup>d</sup> Guangqian Lan <sup>a, b</sup> and Enling Hu\*<sup>a, b, c</sup>

<sup>a</sup>State Key Laboratory of Silkworm Genome Biology, College of Sericulture, Textile and Biomass Sciences, Southwest University, Chongqing 400715, China

<sup>b</sup>Chongqing Engineering Research Center of Biomaterial Fiber and Modern Textile, Chongqing 400715, China

<sup>c</sup>Institute of Textiles and Clothing, The Hong Kong Polytechnic University, Kowloon, Hong Kong

<sup>d</sup>The Ninth People's Hospital of Chongqing, Chongqing 400715, China

\*corresponding authors

E-mail addresses: enling.allen.hu@connect.polyu.hk

<sup>1</sup>Equally contributed

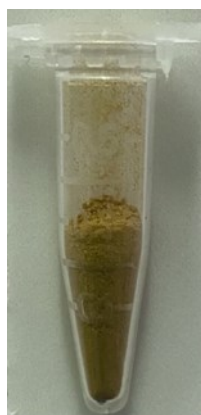

Figure S1 Digital photograph of Pro-MAS.

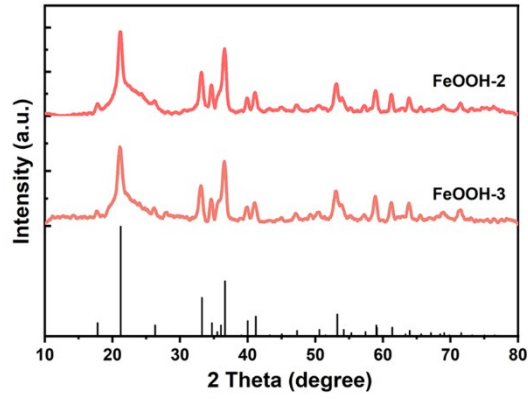

Figure S2 XRD patterns of FeOOH-2 and FeOOH-3.

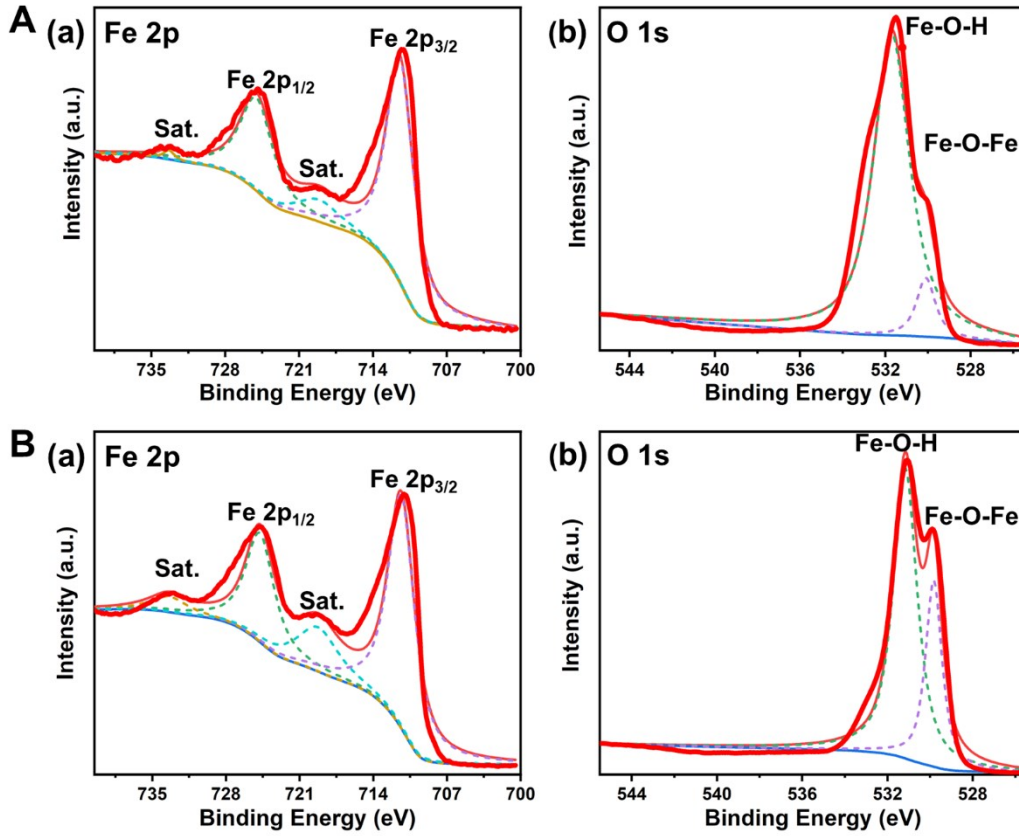

Figure S3 XPS spectra of (A) FeOOH-2 and (B) FeOOH-3: (a) Fe 2p and (b) O 1s.

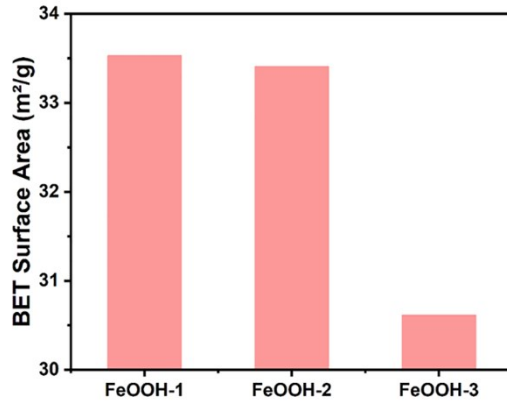

Figure S4 BET surface area of the as-prepared FeOOH materials.

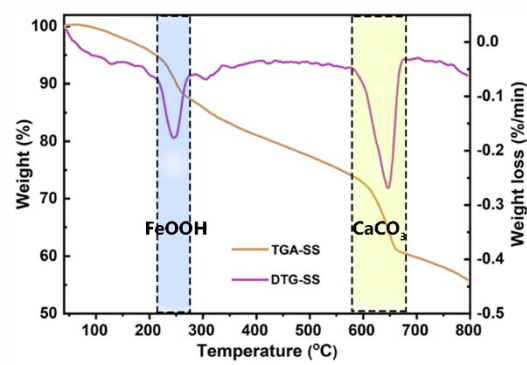

Figure S5 TG curves of Ca-MAS.

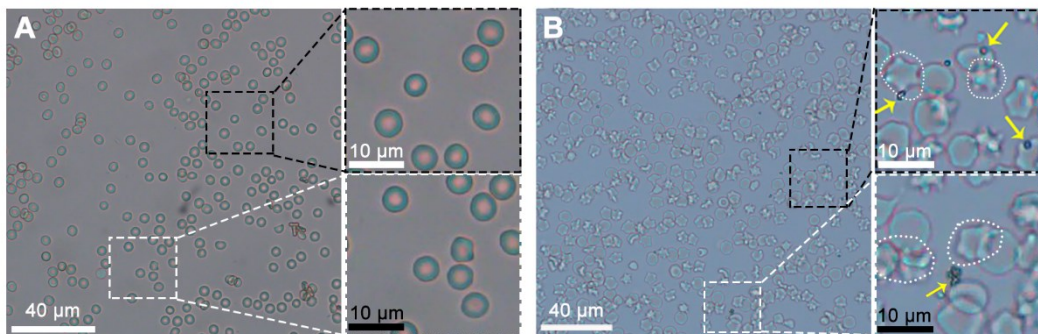

Fig

ure S6 Optical micrographs of the blood cells untreated (A) and after co-incubation with Pro-MAS (B). MAS is indicated with yellow arrows and echinocyte is outlined with white dotted lines.

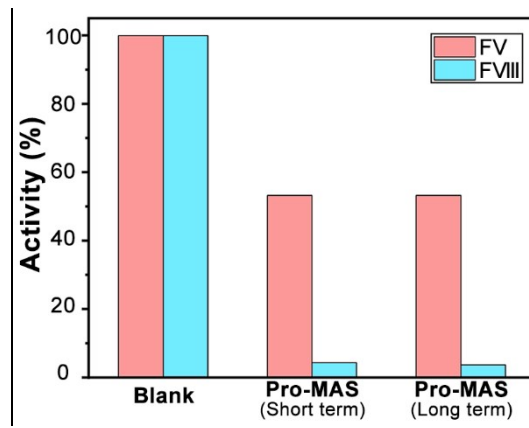

Figure S7 The activity of coagulation factor V (FV) and factor VIII (FVIII).
